# Supplementary material
Source: PubMed Central journal article supplement (PMC2438455)
Supplement: tpc.108.059311_1.pdf [file tpc.108.059311_1.pdf]

Supplemental data. Yamaji et al. (2008). A transporter regulating silicon distribution in rice shoots.

|      |     |                                                                |
|------|-----|----------------------------------------------------------------|
| Lsi1 | 1   | MASNN--SRTNSRANYSNEIHDLSTVQNG-TMPTMYGKAIADFFPPHLLKKVSEVVA      |
| Lsi6 | 1   | MASTTAPSRNRSRVNYSNEIHDLSTVQSVSAVPSVYYPEKSFADIFPPNLLKKVISEVVA   |
|      |     | H2                                                             |
| Lsi1 | 58  | TFLLVFMTCGAAGISGSDLRISQLGQSIAGGLIVTVMYAVGHISGAHMNPAVTLAFV      |
| Lsi6 | 61  | TFLLVFVTCGAASIIYGEDMKRISQLGQSVVGLIVTVMYATGHISGAHMNPAVTLSEAF    |
|      |     | NPA <sub>1</sub>                                               |
| Lsi1 | 118 | FRHFPWIQVPFYWAAQFTGATCASFVLKAVIHPVDVIGTTTPVGPHWHSLVVEIVTFNM    |
| Lsi6 | 121 | FRHFPWIQVPFYWAAQFTGAMCAAFVLRVLYPIEVLGTTTPTGPHWHALVIEIVVTFNM    |
|      |     | H5      LE <sub>1</sub> LE <sub>2</sub>                        |
| Lsi1 | 178 | MFVTLAVATDTRAVGELAGLAVGSAVCITSIIFAGAISSGSMNPARTLGPALASNKFDGLW  |
| Lsi6 | 181 | MFVTCVATDSRAVGELAGLAVGSAVCITSIIFAGPVSSGSMNPARTLAPAVASNVYTGLW   |
|      |     | NPA <sub>2</sub>                                               |
| Lsi1 | 238 | IYFLGPVMGTLSGAWTYTFFIRFEDTPKEG---SSQKLSSFKLRRLLRSQQSIAADDVDEME |
| Lsi6 | 241 | IYFLGPVVGTLSGAWVYTYIRFEEAPAAAGGAAPQKLSSFKLRRLLRSQ-SMAADEFDNV-  |
| Lsi1 | 295 | NIQV                                                           |
| Lsi6 |     | ----                                                           |

**Supplemental Figure 1.** Alignment of amino acid sequence of Lsi1 and Lsi6. Identical and similar amino acids are shaded in black and gray, respectively. Two conserved NPA motifs (NPA<sub>1</sub> and NPA<sub>2</sub>) and four residues of the aromatic/arginine selectivity filter (H2, H5, LE<sub>1</sub>, and LE<sub>2</sub>) are indicated in blue and red letters, respectively. The red open box indicates the peptide sequence that the anti-Lsi6 antibody was raised against.

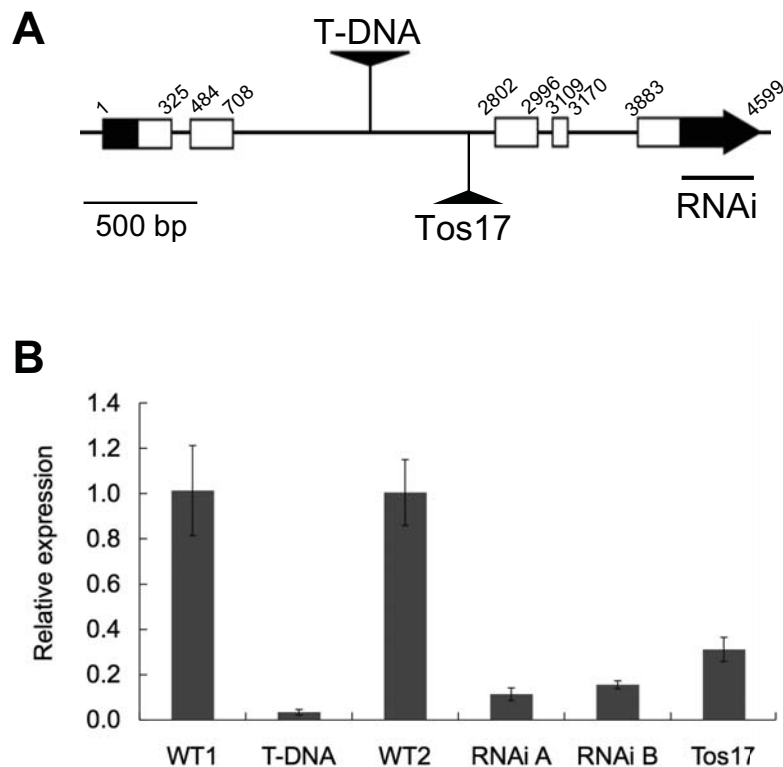

**Supplemental Figure 2.** *Lsi6* gene structure and suppression lines.

**(A)** The *Lsi6* gene is composed of 5 exons and 4 introns. The open reading frame and untranslated region are indicated as open and filled boxes, respectively. Numbers indicate distance from the putative transcriptional start site (bp). Positions of the T-DNA and Tos17 insertion mutations and target sequence of RNAi are indicated. **(B)** *Lsi6* expression of wild-type rice and knockdown lines. Whole roots from the 3-week old seedlings grown hydroponically were used for RNA extraction and the amount of *Lsi6* transcript in different lines was determined by quantitative real-time RT-PCR. WT1: Dongjin; T-DNA: T<sub>2</sub> homozygous progeny of T-DNA insertion mutant; WT2: Nipponbare; RNAi A and B: T<sub>2</sub> progenies of two independent RNAi lines; Tos17: T<sub>2</sub> homozygous progeny of Tos17 insertion mutant. Means ± SD (n = 3) are shown.

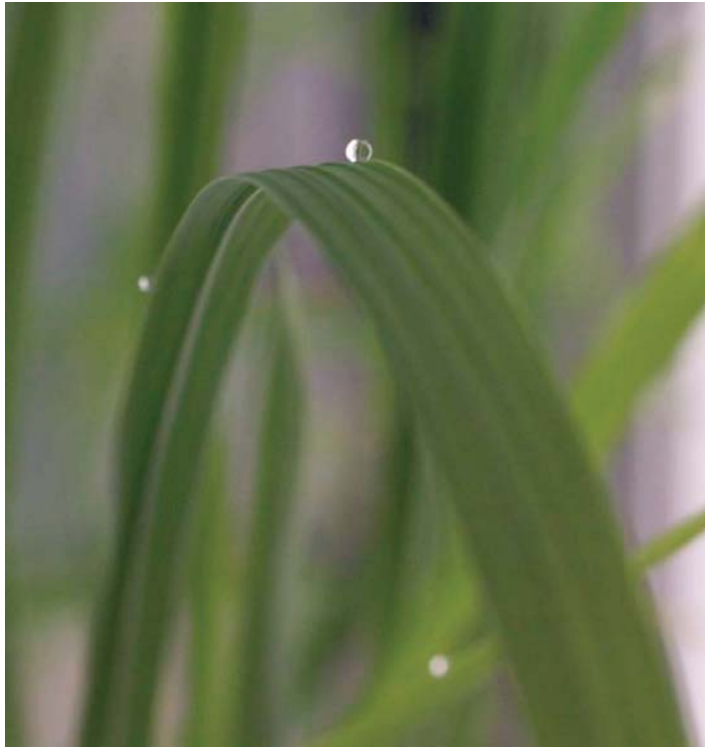

**Supplemental Figure 3.** Leaf guttation of wild-type rice (cv. Dongjin). Picture was taken just after sunset under greenhouse conditions.
